# Supplementary material for: The Theoretical Model Construction of the Identity of Chinese Preservice Physical Education Teachers ——Based on the Grounded Theory
Source: Research Square preprint supplement (doi:10.21203/rs.3.rs-5840367/v1), 2025-02-03
Supplement: Supplementary file 1 [file ceb13fc5d8f0055f5f5be88b.docx]

**Appendix**

**Table A1. Labeling results.**

| **No.** | **Tagged Labels** | **No.** | **Tagged Labels** |
| --- | --- | --- | --- |
| E1 | Professional ideal is the key factor of pre-service PE teacher's identity | E87 | Rich experience of teaching practice is the key factor of professional identity of pre-service physical education teachers. |
| E2 | The State attaches great importance to the health level of adolescents | E88 | The degree of difficulty of curriculum knowledge in physical education will affect the professional identity of pre-service physical education teachers. |
| E3 | My tutor taught me how to teach students in PE and health class in a professional way | E89 | I learned how to present a good personal image in the sports major course in the university. |
| E4 | The professional identity of college tutors also affects the identity of pre-service PE teachers | E90 | The personal image of physical education teachers is a key factor in shaping the identity of pre-service physical education teachers. |
| E5 | The attitude of the tutor affects my judgment of the PE teacher | E91 | I like sports since childhood, I am sunny and cheerful, suitable for physical education teachers. |
| E6 | PE teachers in primary and secondary schools have a deep influence on the health level of pre-service PE teachers | E92 | I chose the major of physical education because I was a physical education teacher. |
| E7 | Mentor guidance will enable pre-service PE teachers to have a deeper understanding of the job of PE teacher | E93 | My parents encouraged me to be a physical education teacher. |
| E8 | Our specialized gymnastics classes help us get into good shape | E94 | Physical education professional courses can make pre-service physical education teachers enter the role of teachers quickly. |
| E9 | A good PE and health course is not easy and challenging | E95 | I often get along with students of equal professional level. |
| E10 | It is believed that PE teachers playing an unessential role in school education | E96 | Mentors can help PPETs and students maintain a good relationship. |
| E11 | The study of specialized PE courses is very important for pre-service PE teachers to know themselves | E97 | China's social and cultural environment is increasingly recognizing the profession of physical education teachers. |
| E12 | I have a wealth of basic theoretical knowledge and can get good results in the PE examination | E98 | Gender discrimination will seriously affect the identity of physical education teachers. |
| E13 | My academic record in college is not very good, which has a great influence on whether I can be a PE teacher | E99 | The traditional culture of sports in my internship school is very good, which can help me improve my teaching perception. |
| E14 | To be a PE teacher is to know a lot of difficult PE curriculum knowledge | E100 | My internship school will regularly carry out sports teaching research activities, which can improve our teaching level. |
| E15 | Pre-service PE teachers should have rich practical experience in college | E101 | My internship results are very bad, which makes me lack the self-confidence to be a physical education teacher. |
| E16 | Our PE professional courses can help us to have a good teaching image | E102 | I like the former physical education teachers, so I recognize the profession of physical education teachers. |
| E17 | Student tutors can help pre-service PE teachers build a good personal image | E103 | The encouragement of family and teachers will enhance the self-efficacy of pre-service physical education teachers. |
| E18 | Student tutors can help pre-service PE teachers improve their teaching experience | E104 | Physical education professional courses systematically and comprehensively train physical education normal students. |
| E19 | Practice results affect the professional confidence of pre-service PE teachers | E105 | Communication among students with the same professional level can promote the self-efficacy of pre-service PE teachers. |
| E20 | Career development planning is the key factor affecting the identity of pre-service PE teachers | E106 | Pre-service physical education teachers can better adapt to the environment of physical education and health classroom. |
| E21 | It is my goal to take PE teacher as my ideal career | E107 | The state helps physical education teachers improve their welfare benefits through sports policies. |
| E22 | Teacher identity is largely determined by the impression of teachers in childhood | E108 | In some practice schools, male PE teachers may be preferred. |
| E23 | The degree of knowledge mastery in learning curriculum theory will reconstruct the professional identity of teachers | E109 | The traditional cultural concept is not conducive to the development of female PE teachers. |
| E24 | The professional attitude of college tutors affects my perception of PE teacher's identity | E110 | The teaching atmosphere of the practice school helps the pre-service physical education teachers to feel the good working environment in advance. |
| E25 | I am proud that my major will improve the physical and mental health of teenagers | E111 | My internship was great because I learned a lot about teaching methods. |
| E26 | When I was a child, I admired the PE and health knowledge level of primary and secondary school PE teachers | E112 | Regular teaching and research activities are conducive to building a teaching community. |
| E27 | The current social and cultural evaluation of PE teachers is not good | E113 | The traditional culture of the practice school will make the pre-service physical education teachers love the profession of physical education teachers more. |
| E28 | I think when PE teacher tall and strong, can exercise | E114 | The traditional culture of the practice school affects my teaching behavior. |
| E29 | Facing the reality of teaching work will make pre-service PE teachers face challenges | E115 | Pre-service Physical Education Teachers Need a Good Teaching Atmosphere |
| E30 | The guidance of the tutor will help the pre-service PE teachers to shape the image of PE teachers | E116 | My internship school will hold regular sports festivals, which makes me full of expectations for the profession of physical education teachers. |
| E31 | Will my tutor teach me how to become a PE teacher | E117 | The Physical Culture Festival in the Practice School Promotes the Identity of PPETs |
| E32 | I want to be a PE teacher because PE teachers are more relaxed | E118 | I can actively mobilize students in the classroom, which makes me feel that being a physical education teacher is a happy job. |
| E33 | I think I can always keep a good attitude in sports simulation teaching, which let me accumulate a lot of teaching experience | E119 | I sometimes worry about whether I can be a good physical education teacher, because I am a girl. |
| E34 | PE curriculum knowledge is more difficult, let me lose confidence | E120 | Often on the Internet, some people will ridicule physical education teachers. |
| E35 | I can be a good PE teacher, because I have rich PE teaching practice experience | E121 | The degree of respect for physical education teachers in the social and cultural environment will affect the identity of pre-service physical education teachers. |
| E36 | PE courses can help pre - service PE teachers to cultivate their own image | E122 | Physical education courses cover a variety of disciplines, including ball games, anatomy, physiology and health care, and so on. |
| E37 | Whether PE teachers punish students is the key to affect the identity of pre-service PE teachers | E123 | Practice tutors have rich teaching experience, which can promote a harmonious relationship with students. |
| E38 | My trainee tutor helped me improve the way I teach | E124 | Intern tutors promote interaction between students and teachers through games and competitions. |
| E39 | Practice achievement is the key factor affecting the identity of pre-service PE teachers | E125 | The teaching experience of the practical tutor can help the pre-service physical education teachers to deal with the teacher-student relationship better. |
| E40 | My college mentor will design suitable career development plan for us | E126 | My character is more suitable for physical education teachers. |
| E41 | Being a PE teacher was my childhood dream | E127 | PPETs' Personality Affects Teachers' Job Search Motivation |
| E42 | The identity of pre-service PE teachers is greatly influenced by PE teachers in middle and primary schools | E128 | Extroverted pre-service PE teachers are more likely to work as PE teachers. |
| E43 | The guidance of a mentor will make it easier for me to become a qualified PE teacher | E129 | The teacher encouraged me to be a physical education teacher. |
| E44 | The study of specialized PE courses is very important to the development of pre-service PE teachers | E130 | Physical Education Professional Courses Help PPETs to Adapt to Teaching |
| E45 | The mastery of curriculum learning will affect the pre-service PE teachers' professional identification | E131 | Sports professional courses help me shape the image of physical education teachers. |
| E46 | The professional level of my tutor will affect my identity as a PE teacher | E132 | On the whole, the social and cultural environment recognizes the profession of physical education teachers. |
| E47 | The PE teacher of primary and secondary school left me a deep impression | E133 | We often imitate being a physical education teacher in physical education professional courses. |
| E48 | Influenced by primary school PE teachers, I want to be a PE teacher | E134 | The teaching philosophy of the practicum tutor will help the pre-service PE teachers to improve their teaching. |
| E49 | The attitude of tutors in college will affect the identity of pre-service PE teachers | E135 | Practice instructors often understand students'physical feelings and psychological state in physical education and health classes. |
| E50 | My tutor will arrange PE teaching systematically and scientifically, so that I can get exercise | E136 | Educational probation can help pre-service physical education teachers to actively explore the ideas of physical education teaching. |
| E51 | My mentor can teach me professional norms of discourse | E137 | Practicum Mentors can Influence PPETs' Approaches to Teaching |
| E52 | PE teacher's salary income is better | E138 | Pre-service physical education teachers think that they love the position of physical education teachers. |
| E53 | The job of PE teacher is more stable | E139 | Pre-service physical education teachers are more interested in physical education and health knowledge, and are more likely to be physical education teachers. |
| E54 | PE teacher sunny, more handsome | E140 | The influence of practice tutors on the teaching perception of pre-service physical education teachers is greater. |
| E55 | With the progress of society, many people still respect PE teachers | E141 | I sometimes see job postings asking for male teachers. |
| E56 | PE teachers can be in better shape | E142 | Self-evaluation during the practicum affects the professional identity of pre-service physical education teachers |
| E57 | Many people think that PE teachers are simple-minded people with well-developed limbs | E143 | Teachers in practice schools often participate in sports teaching and research activities. |
| E58 | PE teachers have a good personal image | E144 | Students' Evaluation as a Key Factor in Pre-service Physical Education Teachers' Sense of Identity |
| E59 | Many people think that PE teachers teach sports skills without teaching health knowledge | E145 | I was frustrated by the average level of teaching during my internship. |
| E60 | The state attaches great importance to students' PE and health education | E146 | The students in my practice class have a good evaluation of me, which makes me more confident to be a physical education teacher. |
| E61 | National leaders pointed out the educational concept of "health first" | E147 | I was dismayed by the fact that my tutor did not speak very well of me and thought I still needed to work hard to improve my teaching. |
| E62 | The current national policy has better welfare treatment for PE teachers | E148 | My internship tutor thinks that I am suitable to be a physical education teacher, which makes me have a strong professional self-confidence. |
| E63 | Mentorship will help pre-professional PE teachers gain insight into the normative teaching theory | E149 | The effect of pre-service physical education teachers' teaching implementation will be affected by the practice supervisor. |
| E64 | I learned how to use standardized passwords to give a good PE class in the PE course of the university | E150 | Practice tutor can help me to establish a good image of physical education teachers. |
| E65 | The teaching theory level of pre-service PE teachers comes from the guidance of tutors to a large extent | E151 | The internship tutor can make my teaching discourse more standardized and more like a physical education teacher. |
| E66 | The professional discourse level of pre-service PE teachers comes from the guidance of tutors to a large extent | E152 | Pre-service physical education teachers prefer primary and secondary school students and are more likely to be physical education teachers. |
| E67 | Career development planning is a common course in our university | E153 | Practice Mentors can Influence the Instructional Design of PPETs |
| E68 | Will college mentors teach us how to design our careers | E154 | Our school will arrange a semester of educational probation activities, which will help us improve the level of physical education teaching. |
| E69 | PE teacher is a relatively free job, you don't have to stay in the classroom | E155 | Educational Probation Activities Help Pre-service Physical Education Teachers to Adapt to Teaching Work in Advance |
| E70 | The results of the practice will allow the pre-service PE teachers to have an understanding of their professional standards | E156 | The teaching philosophy of the practicum supervisor is a key element in the professional identity of the preservice physical education teacher |
| E71 | My parents think I am introverted and unfit to be a PE teacher | E157 | My internship tutor has a very good teaching philosophy. |
| E72 | Practice performance plays an significant role in the future development planning of pre-service PE teachers | E158 | Practice tutors often take care of their students. |
| E73 | Practice results are usually the evaluation of pre-service PE teachers by the tutor | E159 | Educational Probation can Enhance the Self-efficacy of PPETs |
| E74 | I often get frustrated in PE theory examination and PE teaching practice | E160 | Educational probation can show the current ability level of pre-service physical education teachers. |
| E75 | PE teachers can communicate with students freely and exercise together | E161 | The practice tutor will make the pre-service physical education teachers pay more attention to their teaching behavior. |
| E76 | I think I am not competent, because in sports simulation teaching can not always change the classroom atmosphere | E162 | I like to exercise with children, which is an important reason why I am a physical education teacher. |
| E77 | My academic performance in sports was poor, which hit me hard | E163 | The guidance of practice tutors is an important link for pre-service PE teachers to establish a good image of teachers. |
| E78 | The guidance of internship tutor is the key factor that affects the identity of pre-service PE teachers | E164 | The internship school will invite experts to teach physical education teachers. |
| E79 | PE teachers should not physically punish students | E165 | I was able to be a physical education teacher because my internship felt good. |
| E80 | Practice tutors can help pre-service PE teachers from teaching theory to teaching practice | E166 | Regular teaching research activities can help pre-service physical education teachers to enhance their professional identity. |
| E81 | I feel that I am able to maintain a good relationship with my students, thanks to my internship mentor | E167 | I like sports and health knowledge, more willing to study it in depth. |
| E82 | Some PE courses are very difficult, such as anatomy, health science and so on | E168 | During my internship, my students gave me a good evaluation, which promoted my belief in being a physical education teacher. |
| E83 | The difficulty of PE curriculum knowledge will affect the teaching confidence of pre-service PE teachers | E169 | The evaluation of the practice tutor will help the pre-service physical education teachers to improve their teaching behavior. |
| E84 | I often do teaching practice in college, which makes me very confident to be a PE teacher | E170 | Evaluation of Practicum Tutors as a Key Factor in PPETs' Identities |
| E85 | I hate being physically punished by the PE teacher | E171 | Practice schools regularly organize scientific research activities to help pre-service physical education teachers improve their physical education teaching level |
| E86 | Rich practical teaching experience in college will help pre-service PE teachers to enhance their self-confidence | E172 | PPETs' Identity is Influenced by Students' Performance in Class During Internship |

**Table A2. Conceptualization results of 172 tagged labels.**

| **No.** | **Conceptualization Concepts** | **Tagged Labels** | **Number of Materials** | **Number of Participants** |
| --- | --- | --- | --- | --- |
| D1 | Being a PE teacher is an ideal career for pre-service PE teachers | 3 articles：E21、E41、E1 | 13 | 4 |
| D2 | The PE teachers in primary and secondary schools can leave a good impression on pre-service PE teachers | 4 articles：E48、E42、E47、E22 | 8 | 2 |
| D3 | The degree of learning and mastery of PE professional courses will affect the professional judgment of pre-service PE teachers | 4 articles：E23、E44、E45、E11 | 8 | 4 |
| D4 | The professional attitude of tutors will affect the identity of pre-service physical education teachers | 6 articles：E49、E46、E43、E5、E24、E4 | 18 | 10 |
| D5 | The country attaches great importance to physical education teachers so that pre-service physical education teachers have a good sense of professional pride | 5 articles：E62、E60、E61、E2、E25 | 16 | 7 |
| D6 | The physical education and health knowledge level of primary and secondary school physical education teachers left a good impression on pre-service physical education teachers | 2 articles：E26、E6 | 4 | 2 |
| D7 | The evaluation of social and cultural environment on PE teachers will affect the identity of pre-service PE teachers | 5 articles：E27、E57、E55、E59、E10 | 17 | 7 |
| D8 | Pre-service PE teachers think PE teachers have a good personal image | 5 articles：E28、E54、E58、E56、E8 | 13 | 8 |
| D9 | Pre-service PE teachers think that being a PE teacher pays well and is a challenging job | 4 articles：E29、E52、E53、E9 | 12 | 3 |
| D10 | Tutor's guidance will help pre-service PE teachers shape their professional identity | 4 articles：E31、E50、E30、E7 | 12 | 6 |
| D11 | Tutor's guidance will help pre-service PE teachers learn professional discourse and normative teaching theory | 6 articles：E51、E63、E3、E65、E66、E64 | 29 | 9 |
| D12 | Pre-service PE teachers think that PE teachers' work is relatively easy and free | 3 articles：E32、E69、E75 | 16 | 2 |
| D13 | The course learning results during college can enhance the self-efficacy of pre-service PE teachers | 6 articles：E13、E74、E12、E76、E77、E33 | 18 | 6 |
| D14 | The degree of difficulty in the knowledge of physical education courses will affect the self-confidence of pre-service physical education teachers in physical education teaching | 5 articles：E34、E82、E83、E88、E14 | 14 | 5 |
| D15 | Rich teaching intership experience during college helps pre-service PE teachers improve their sense of self-efficacy | 5 articles：E35、E86、E87、E84、E15 | 15 | 7 |
| D16 | PE professional courses help pre-service PE teachers cultivate the image of PE teachers | 4 articles：E36、E89、E8、E16 | 18 | 3 |
| D17 | Whether PE teachers corporally punish students leaves a deep impression on pre-service PE teachers | 3 articles：E37、E85、E79 | 3 | 1 |
| D18 | Intership instructors in primary and secondary schools can help pre-service physical education teachers shape their professional identity | 6 articles：E38、E78、E17、E80、E106、E90 | 13 | 7 |
| D19 | Intership results will affect the professional confidence of pre-service PE teachers | 6 articles：E39、E70、E101、E72、E73、E19 | 18 | 12 |
| D20 | The university tutor will design a career development plan for pre-service physical education teachers | 4 articles：E40、E67、E68、E20 | 11 | 4 |
| D21 | The personality of pre-service PE teachers will affect their identity | 5 articles：E91、E126、E127、E128、E71 | 12 | 6 |
| D22 | In childhood, the impression of PE teachers would make pre-service PE teachers recognize the profession of PE teachers | 2 articles：E92、E102 | 16 | 7 |
| D23 | Encouragement from family and teachers can greatly enhance the self-efficacy of pre-service PE teachers | 3 articles：E93、E129、E103 | 21 | 9 |
| D24 | Physical education professional courses can help pre-service physical education teachers quickly enter the role of teachers | 6 articles：E94、E130、E104、E122、E133、E131 | 8 | 2 |
| D25 | Getting along with students with the same professional level can enhance the sense of self-efficacy of pre-service physical education teachers | 2 articles：E95、E105 | 3 | 1 |
| D26 | The teaching concept of intership guide teachers in primary and secondary schools can help pre-service PE teachers improve their teaching level | 5 articles：E157、E134、E156、E158、E135 | 8 | 2 |
| D27 | The educational internship activities during college help pre-service PE teachers improve their sense of self-efficacy | 5 articles：E155、E159、E36、E160、E154 | 39 | 11 |
| D28 | Primary and secondary school intership guidance teachers can influence the teaching behavior of pre-service physical education teachers | 5 articles：E140、E137、E149、E153、E161 | 18 | 3 |
| D29 | Pre-service physical education teachers' daily preferences will affect their identity | 5 articles：E139、E152、E138、E162、E167 | 23 | 6 |
| D30 | The intership guide teachers in primary and secondary schools can help pre-service PE teachers establish a better image of PE teachers | 3 articles：E150、E151、E163 | 35 | 11 |
| D31 | Primary and secondary school intership instructors can help pre-service physical education teachers and students maintain a harmonious relationship | 5 articles：E96、E123、E124、E125、E81 | 25 | 8 |
| D32 | The respect of social and cultural environment for PE teachers will affect the identity of pre-service PE teachers | 5 articles：E97、E120、E121、E132、E107 | 22 | 5 |
| D33 | Gender discrimination in intership school will affect the role cognition of pre-service physical education teachers | 4 articles：E98、E141、E119、E108 | 7 | 3 |
| D34 | The traditional culture of intership school will affect the teaching ideas of pre-service physical education teachers | 6 articles：E99、E114、E113、E116、E117、E109 | 12 | 6 |
| D35 | The teaching atmosphere of the internship school can help pre-service PE teachers improve their professional identity | 5 articles：E100、E166、E112、E115、E110 | 18 | 3 |
| D36 | The status of students in intership school will affect the professional identity of pre-service physical education teachers | 2 articles：E172、E118 | 5 | 2 |
| D37 | Self-evaluation during intership will affect the identity of pre-service physical education teachers | 4 articles：E145、E111、E165、E142 | 22 | 11 |
| D38 | The evaluation of students during intership will affect the professional beliefs of pre-service PE teachers | 3 articles：E146、E144、E168 | 12 | 8 |
| D39 | The evaluation of the instructor during the intership will affect the professional confidence of the pre-service PE teachers | 4 articles：E148、E170、E147、E169 | 16 | 9 |
| D40 | The scientific research atmosphere of the internship school can help pre-service physical education teachers better improve teaching methods | 3 articles：E143、E164、E171 | 8 | 2 |
|  | Total | 172条 | 606 | 20 |

**Table A3. Results of categorization of 40 concepts.**

| **Subsidiary Categories** | **Concepts** |
| --- | --- |
| C1  Anticipation for the Image of Teachers（4） | D1 Being a PE teacher is an ideal career for pre-service PE teachers |
| D12 Pre-service PE teachers think that PE teachers' work is relatively easy and free |
| D8 Pre-service PE teachers think PE teachers have a good personal image |
| D9 Pre-service PE teachers think that being a PE teacher pays well and is a challenging job |
| C2  Impression of PE Teachers（4） | D2 The PE teachers in primary and secondary schools can leave a good impression on pre-service PE teachers |
| D17 Whether PE teachers corporally punish students leaves a deep impression on pre-service PE teachers |
| D22 In childhood, the impression of PE teachers would make pre-service PE teachers recognize the profession of PE teachers |
| D6 The physical education and health knowledge level of primary and secondary school physical education teachers left a good impression on pre-service physical education teachers |
| C3  Social and Cultural Influence（3） | D5 The country attaches great importance to physical education teachers so that pre-service physical education teachers have a good sense of professional pride |
| D7 The evaluation of social and cultural environment on PE teachers will affect the identity of pre-service PE teachers |
| D32 The respect of social and cultural environment for PE teachers will affect the identity of pre-service PE teachers |
| C4  Personal Characters and Preferences（2） | D21 The personality of pre-service PE teachers will affect their identity |
| D29 Pre-service physical education teachers' daily preferences will affect their identity |
| C5  Curricular Knowledge（4） | D3 The degree of learning and mastery of PE professional courses will affect the professional judgment of pre-service PE teachers |
| D14 The degree of difficulty in the knowledge of physical education courses will affect the self-confidence of pre-service physical education teachers in physical education teaching |
| D24 Physical education professional courses can help pre-service physical education teachers quickly enter the role of teachers |
| D16 Physical education professional courses can help pre-service physical education teachers quickly enter the role of teachers |
| C6  Counselors’ Guidance（4） | D4 The professional attitude of tutors will affect the identity of pre-service physical education teachers |
| D10 Tutor's guidance will help pre-service PE teachers shape their professional identity |
| D11 Tutor's guidance will help pre-service PE teachers learn professional discourse and normative teaching theory |
| D20 The university tutor will design a career development plan for pre-service physical education teachers |
| C7  Self-efficacy（5） | D27 The educational internship activities during college help pre-service PE teachers improve their sense of self-efficacy |
| D13 The course learning results during college can enhance the self-efficacy of pre-service PE teachers |
| D15 Rich teaching intership experience during college helps pre-service PE teachers improve their sense of self-efficacy |
| D23 Encouragement from family and teachers can greatly enhance the self-efficacy of pre-service PE teachers |
| D25 Getting along with students with the same professional level can enhance the sense of self-efficacy of pre-service physical education teachers |
| C8  Internship Guidance（5） | D30 The intership guide teachers in primary and secondary schools can help pre-service PE teachers establish a better image of PE teachers |
| D26 The teaching concept of intership guide teachers in primary and secondary schools can help pre-service PE teachers improve their teaching level |
| D18 Intership instructors in primary and secondary schools can help pre-service physical education teachers shape their professional identity |
| D28 Primary and secondary school intership guidance teachers can influence the teaching behavior of pre-service physical education teachers |
| D31 Primary and secondary school intership instructors can help pre-service physical education teachers and students maintain a harmonious relationship |
| C9  Internship Environment（5） | D35 The teaching atmosphere of the internship school can help pre-service PE teachers improve their professional identity |
| D40 The scientific research atmosphere of the internship school can help pre-service physical education teachers better improve teaching methods |
| D33 Gender discrimination in intership school will affect the role cognition of pre-service physical education teachers |
| D34 The traditional culture of intership school will affect the teaching ideas of pre-service physical education teachers |
| D36 The status of students in intership school will affect the professional identity of pre-service physical education teachers |
| C10  Internship Evaluation（5） | D19 Intership results will affect the professional confidence of pre-service PE teachers |
| D38 The evaluation of students during intership will affect the professional beliefs of pre-service PE teachers |
| D39 The evaluation of the instructor during the intership will affect the professional confidence of the pre-service PE teachers |
| D37 Self-evaluation during intership will affect the identity of pre-service physical education teachers |
